# Supplementary material for: Synthesis and Structure of the Inclusion Complex {NdQ[5]K@Q[10](H2O)4}·4NO3·20H2O
Source: MDPI journal article supplement (doi:10.3390/molecules22071147), 2017-07-09

## Electronic Supplementary Information

### Synthesis and structure of the inclusion complex $\{\text{NdQ}[5]\text{K}@\text{Q}[10](\text{H}_2\text{O})_4\}\cdot 4\text{NO}_3\cdot 20\text{H}_2\text{O}$

Li Xia Chen,<sup>a</sup> Jing Lan Kan,<sup>b</sup> Hang Cong,<sup>a</sup> Timothy J. Prior,<sup>c</sup> Zhu Tao,<sup>a</sup> Xin Xiao,<sup>\*a</sup> and  
Carl Redshaw<sup>c\*</sup>

<sup>a</sup> Key Laboratory of Macrocyclic and Supramolecular Chemistry of Guizhou Province, Guizhou University, Guiyang 550025, China

<sup>b</sup> College of Chemistry, Chemical Engineering and Materials Science, Collaborative Innovation Center of Functionalized Probes for Chemical Imaging in Universities of Shandong, Key Laboratory of Molecular and Nano Probes, Ministry of Education, Shandong Normal University, Jinan 250014, China.

<sup>c</sup> School of Mathematics and Physical Sciences, University of Hull, Hull HU6 7RX, U.K.

## Contents

**Figure S1.** Structure of the inclusion complex  $\{\text{NdQ}[5]\text{K}@\text{Q}[10](\text{H}_2\text{O})_4\}\cdot 4\text{NO}_3\cdot 20\text{H}_2\text{O}$  as viewed from the side.

**Figure S2.** Dimensions of the Q[10]. The distances are in Å; the inner Q[5] and other atoms have been removed for clarity.

**Figure S1.** Structure of the inclusion complex  $\{\text{NdQ}[5]\text{K}@\text{Q}[10](\text{H}_2\text{O})_4\} \cdot 4\text{NO}_3 \cdot 20\text{H}_2\text{O}$  as viewed from the side.

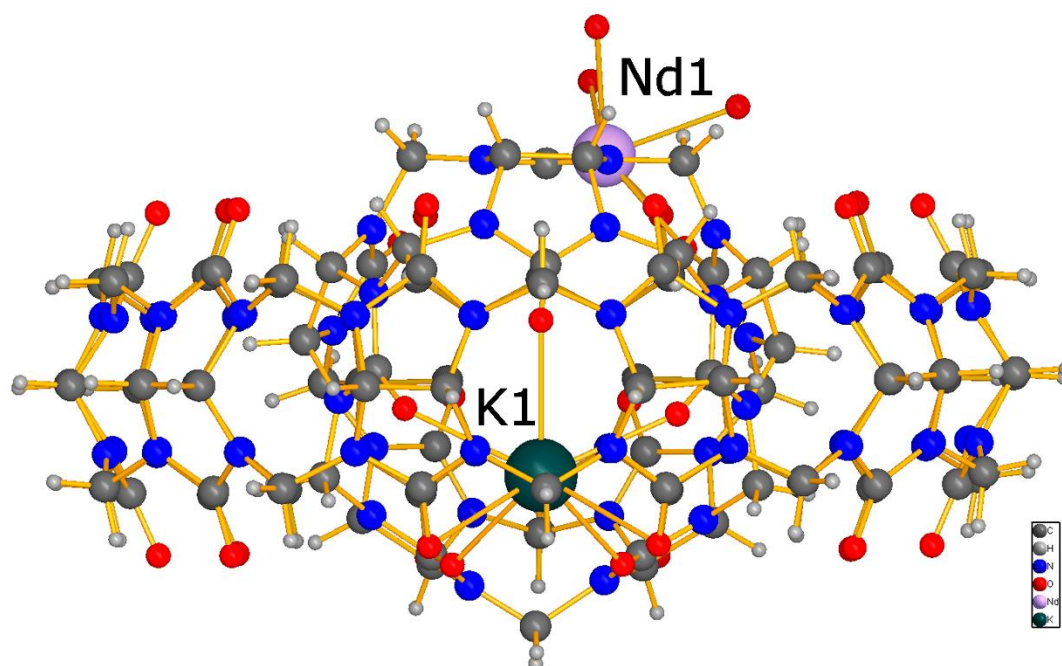

**Figure S2.** Dimensions of the Q[10]. The distances are in Å; the inner Q[5] and other atoms have been removed for clarity.

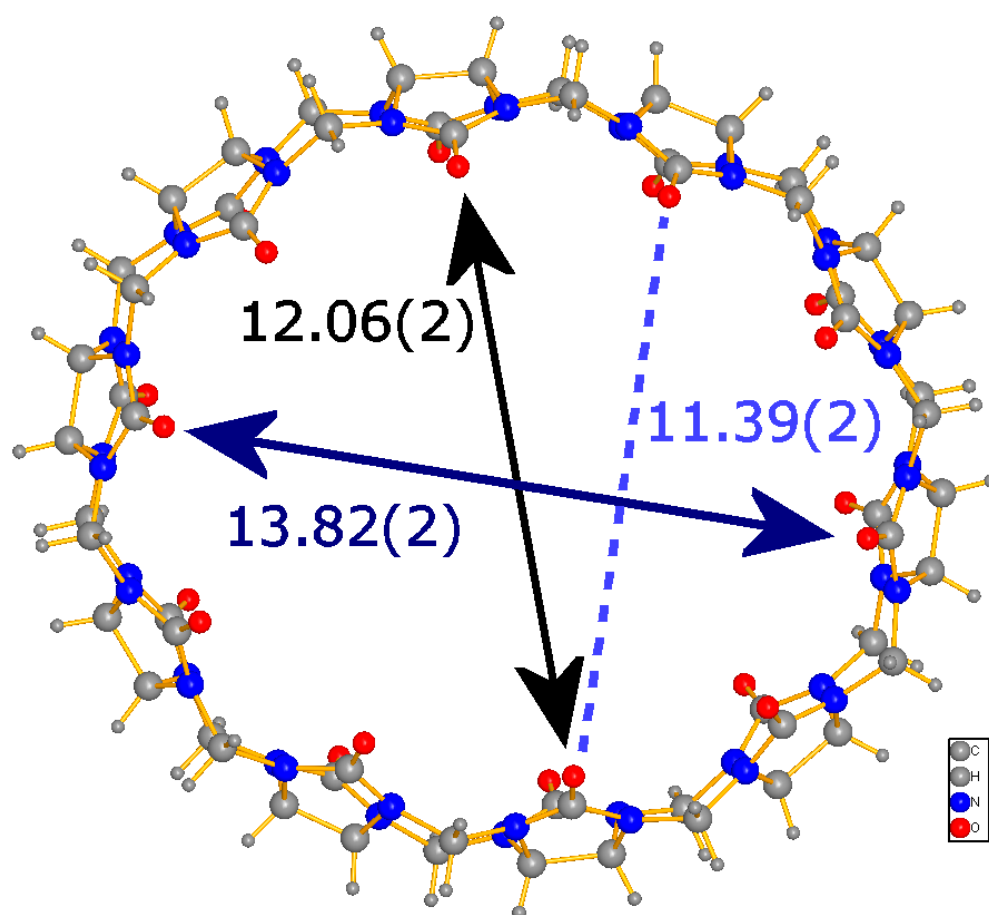

Supplement: s1 [file s1]
